# Supplementary material for: The structural stability and defect-tolerance of ionic spinel semiconductors for high-efficiency solar cells
Source: Royal Society of Chemistry journal article supplement (doi:10.1039/d1ta02409d), 2021-01-01
Supplement: d1ta02409d1.pdf [file d1ta02409d1.pdf]

## Supporting Information:

### Structural Stability and Defect-Tolerance of Ionic Spinel Semiconductor for High-Efficiency Solar Cells

Hanzhen Liang,<sup>†</sup> Huiwen Xiang,<sup>†</sup> Rui Zhu, Chengyan Liu\*, Yu Jia

Key Laboratory for Special Functional Materials of Ministry of Education, School of Materials Science and Engineering, Henan University, Kaifeng, Henan 475001, China

E-mail: cylu@henu.edu.cn

#### Part 1. Chemical potential conditions of HgX<sub>2</sub>S<sub>4</sub> phase

Since the formation energy of defects is the function of chemical potential, we need to obtain the phase diagram which limits the region of chemical potential before calculating defects' formation energies. HgX<sub>2</sub>S<sub>4</sub> phase diagram is thermodynamically limited by the following conditions. To avoid the pure phase of elements, the following conditions must be satisfied

$$\mu_{\text{Hg}} \leq 0, \mu_{\text{X}} \leq 0, (\text{X} = \text{In, Sc and Y}), \mu_{\text{S}} \leq 0. \quad (\text{S1})$$

Similarly, to exclude the formation of secondary phase of compounds, their formation enthalpies must satisfy eq. S2 for HgIn<sub>2</sub>S<sub>4</sub>, eq. S3 for HgSc<sub>2</sub>S<sub>4</sub> and eq. S4 for HgY<sub>2</sub>S<sub>4</sub>.

$$\left\{ \begin{array}{ll} \mu_{\text{Hg}} + \mu_{\text{S}} \leq \Delta H_{\text{HgS}} (-0.42 \text{ eV}) & 2\mu_{\text{In}} + 3\mu_{\text{S}} \leq \Delta H_{\text{In}_2\text{S}_3} (-4.03 \text{ eV}) \\ \mu_{\text{Hg}} + 4\mu_{\text{S}} \leq \Delta H_{\text{HgS}_4} (-1.37 \text{ eV}) & 3\mu_{\text{In}} + \mu_{\text{S}} \leq \Delta H_{\text{In}_3\text{S}} (-1.27 \text{ eV}) \\ \mu_{\text{In}} + \mu_{\text{Hg}} \leq \Delta H_{\text{InHg}} (-0.42 \text{ eV}) & 3\mu_{\text{In}} + 4\mu_{\text{S}} \leq \Delta H_{\text{In}_3\text{S}_4} (-5.08 \text{ eV}) \\ \mu_{\text{In}} + 3\mu_{\text{Hg}} \leq \Delta H_{\text{InHg}_3} (-0.46 \text{ eV}) & 5\mu_{\text{In}} + 4\mu_{\text{S}} \leq \Delta H_{\text{In}_5\text{S}_4} (-6.13 \text{ eV}) \\ 3\mu_{\text{In}} + \mu_{\text{Hg}} \leq \Delta H_{\text{In}_3\text{Hg}} (-1.29 \text{ eV}) & 5\mu_{\text{In}} + 8\mu_{\text{S}} \leq \Delta H_{\text{In}_5\text{S}_8} (-8.48 \text{ eV}) \\ \mu_{\text{In}} + \mu_{\text{S}} \leq \Delta H_{\text{InS}} (-1.61 \text{ eV}) & 6\mu_{\text{In}} + 7\mu_{\text{S}} \leq \Delta H_{\text{In}_6\text{S}_7} (-10.23 \text{ eV}) \\ \mu_{\text{In}} + 2\mu_{\text{S}} \leq \Delta H_{\text{InS}_2} (-0.64 \text{ eV}) & 11\mu_{\text{In}} + 16\mu_{\text{S}} \leq \Delta H_{\text{In}_{11}\text{S}_{16}} (-21.31 \text{ eV}) \end{array} \right. \quad (\text{S2})$$

$$\left\{ \begin{array}{ll} \mu_{\text{Hg}} + \mu_{\text{S}} \leq \Delta H_{\text{HgS}} (-0.42 \text{ eV}) & 3\mu_{\text{Sc}} + \mu_{\text{Hg}} \leq \Delta H_{\text{Sc}_3\text{Hg}} (-1.14 \text{ eV}) \\ \mu_{\text{Hg}} + 4\mu_{\text{S}} \leq \Delta H_{\text{HgS}_4} (-1.37 \text{ eV}) & \mu_{\text{Sc}} + \mu_{\text{S}} \leq \Delta H_{\text{ScS}} (-4.02 \text{ eV}) \\ \mu_{\text{Sc}} + \mu_{\text{Hg}} \leq \Delta H_{\text{ScHg}} (-1.06 \text{ eV}) & \mu_{\text{Sc}} + 2\mu_{\text{S}} \leq \Delta H_{\text{ScS}_2} (-3.68 \text{ eV}) \\ \mu_{\text{Sc}} + 3\mu_{\text{Hg}} \leq \Delta H_{\text{ScHg}_3} (-1.18 \text{ eV}) & 2\mu_{\text{Sc}} + 3\mu_{\text{S}} \leq \Delta H_{\text{Sc}_2\text{S}_3} (-10.60 \text{ eV}) \end{array} \right. \quad (\text{S3})$$

$$\left\{ \begin{array}{ll} \mu_{\text{Hg}} + \mu_{\text{S}} \leq \Delta H_{\text{HgS}} (-0.42 \text{ eV}) & \mu_{\text{Y}} + \mu_{\text{S}} \leq \Delta H_{\text{YS}} (-4.39 \text{ eV}) \\ \mu_{\text{Hg}} + 4\mu_{\text{S}} \leq \Delta H_{\text{HgS}_4} (-1.37 \text{ eV}) & \mu_{\text{Y}} + 2\mu_{\text{S}} \leq \Delta H_{\text{YS}_2} (-0.30 \text{ eV}) \\ \mu_{\text{Y}} + \mu_{\text{Hg}} \leq \Delta H_{\text{YHg}} (-1.26 \text{ eV}) & 2\mu_{\text{Y}} + 3\mu_{\text{S}} \leq \Delta H_{\text{Y}_2\text{S}_3} (-11.64 \text{ eV}) \\ \mu_{\text{Y}} + 2\mu_{\text{Hg}} \leq \Delta H_{\text{YHg}_2} (-1.57 \text{ eV}) & 5\mu_{\text{Y}} + 7\mu_{\text{S}} \leq \Delta H_{\text{Y}_5\text{S}_7} (-27.94 \text{ eV}) \\ \mu_{\text{Y}} + 3\mu_{\text{Hg}} \leq \Delta H_{\text{YHg}_3} (-1.83 \text{ eV}) & \end{array} \right. \quad (\text{S4})$$

## Part 2. Degeneracy factor of intrinsic defects in $\text{HgX}_2\text{S}_4$ spinel system

The degeneracy factor  $g_q$  of a charged defect level and the arrangement of electron on defect energy levels of different defects are listed in the following Table S1.

**Table S1.** Degeneracy factor of intrinsic defects in  $\text{HgX}_2\text{S}_4$  spinel system combining with the consideration of energy level splitting in crystal field.

| Defects                   | $q$ | $g_q$                          |                   | Crystal fields |        | Configurations<br>(take $q = +1/q = -1$ as an example)           |                            |
|---------------------------|-----|--------------------------------|-------------------|----------------|--------|------------------------------------------------------------------|----------------------------|
|                           |     | X=In                           | X=Sc/Y            | X=In           | X=Sc/Y | X=In                                                             | X=Sc/Y                     |
| $\text{Hg}_i$             | 0   | $C_2^2 = 1$                    |                   |                |        | $\square \text{Hg} \square$                                      |                            |
|                           | 1+  | $C_2^1 = 2$                    |                   | $D_{3d}$       |        | $6s \uparrow$                                                    |                            |
|                           | 2+  | $C_2^0 = 1$                    |                   |                |        |                                                                  |                            |
| $\text{X}_i$              | 0   | $C_2^1 = 2$                    | $C_2^1 C_2^1 = 4$ |                |        | $\square \text{In} \square$                                      | $\square \text{X} \square$ |
|                           | 1+  | $C_2^2 = 1$                    | $C_2^2 = 1$       | $D_{3d}$       |        | $5p \rightarrow 5p_x / 5p_y$                                     | $3d \rightarrow E'_g$      |
|                           | 2+  | $C_2^1 = 2$                    | $C_2^1 = 2$       |                |        | $5p_z$                                                           | $A_{1g}$                   |
|                           | 3+  | $C_2^0 = 1$                    | $C_2^0 = 1$       |                |        | $5s$                                                             | $E_g$                      |
|                           |     |                                |                   |                |        | $4s$                                                             | $4s$                       |
| $\text{X}_{\text{Hg}}$    | 0   | $C_2^1 = 2$                    | $C_2^1 = 2$       |                |        | $\square \text{In} \square$                                      | $\square \text{X} \square$ |
|                           | 1+  | $C_2^0 = 1$                    | $C_2^0 = 1$       | $T_d$          |        | $5p$                                                             | $3d \rightarrow T_2$       |
| $\text{V}_\text{S}$       | 0   | $C_2^1 (C_2^1)^3 = 16$         |                   |                |        | $5s$                                                             | $E$                        |
|                           | 1+  | $C_2^1 (C_2^1)^3 = 16$         |                   |                |        | $6s \uparrow \downarrow$                                         | $3d$                       |
|                           | 2+  | $C_2^0 (C_2^0)^3 = 1$          |                   |                |        | $4s$                                                             | $4s$                       |
| (take X=Sc as an example) |     |                                |                   |                |        |                                                                  |                            |
| $\text{V}_\text{X}$       | 0   | $C_2^1 C_3^2 C_3^1 C_3^1 = 36$ |                   |                |        |                                                                  |                            |
|                           | 1-  | $C_2^1 C_3^1 = 6$              |                   |                |        | $3p \uparrow \downarrow \uparrow \uparrow$                       | (S)                        |
|                           | 2-  | $C_2^1 C_3^2 = 6$              |                   |                |        | $3s$                                                             | $\uparrow \downarrow$      |
|                           | 3-  | $C_3^0 = 1$                    |                   |                |        |                                                                  |                            |
| $\text{V}_{\text{Hg}}$    | 0   | $C_2^1 C_3^1 = 6$              |                   |                |        |                                                                  | (S)                        |
|                           | 1-  | $C_2^1 C_3^2 = 6$              |                   |                |        | $3p \uparrow \downarrow \uparrow \downarrow \uparrow$            | $\uparrow$                 |
|                           | 2-  | $C_3^0 = 1$                    |                   |                |        | $3s$                                                             | $\uparrow \downarrow$      |
| $\text{Hg}_\text{X}$      | 0   | $C_2^1 C_3^2 = 6$              |                   |                |        | $3p \uparrow \downarrow \uparrow \downarrow \uparrow \downarrow$ | (S)                        |
|                           | 1-  | $C_3^0 = 1$                    |                   | $O_h$          |        | $3s$                                                             | $\uparrow \downarrow$      |

### Part 3. Optical absorption coefficient and partial charge density of CBM

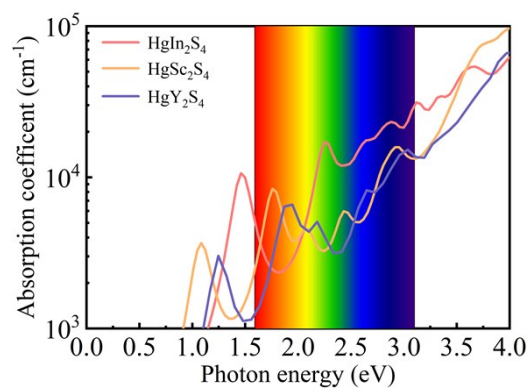

Fig. S1. Optical absorption coefficient of HgX<sub>2</sub>S<sub>4</sub> spinel semiconductors (X=In, Sc and Y).

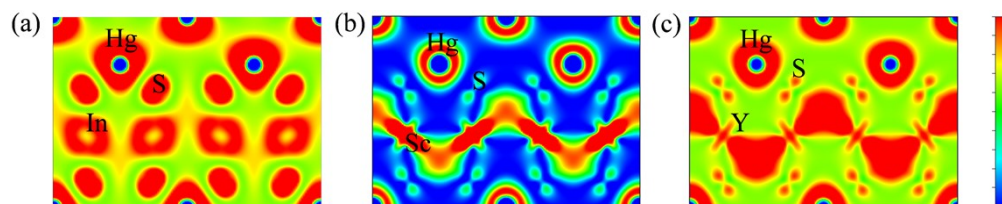

Fig. S2. Partial charge density of CBM for (a) HgIn<sub>2</sub>S<sub>4</sub>, (b) HgSc<sub>2</sub>S<sub>4</sub> and (c) HgY<sub>2</sub>S<sub>4</sub>.
